# Supplementary figures and images for: Depot specific differences in the adipogenic potential of precursors are mediated by collagenous extracellular matrix and Flotillin 2 dependent signaling
Source: PubMed Central journal article supplement — Mol Metab. 2016 Jul 30;5(10):937–47. doi: 10.1016/j.molmet.2016.07.008 (PMC5034610; doi:10.1016/j.molmet.2016.07.008), 2016-07-30

**A**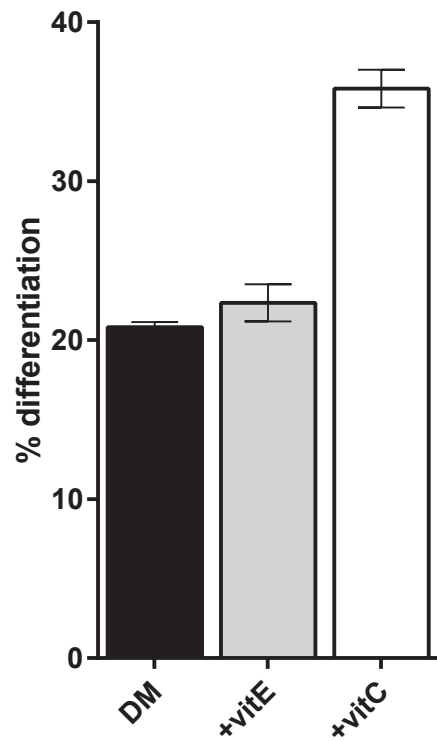**B**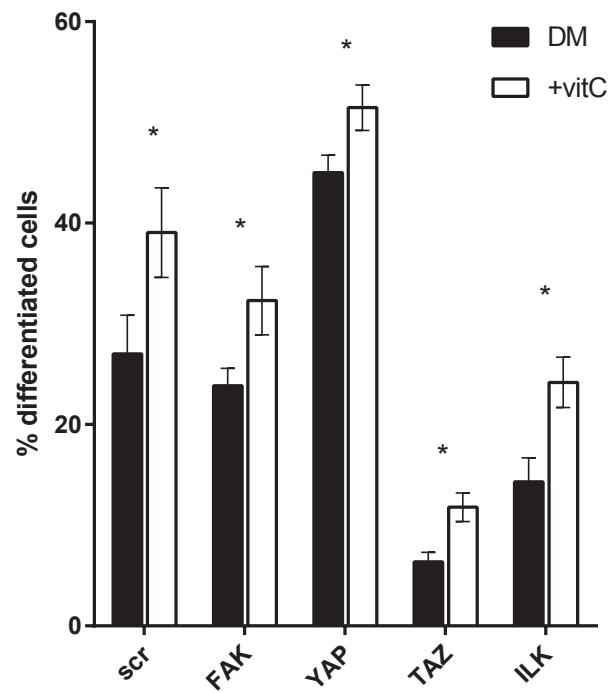

**A**

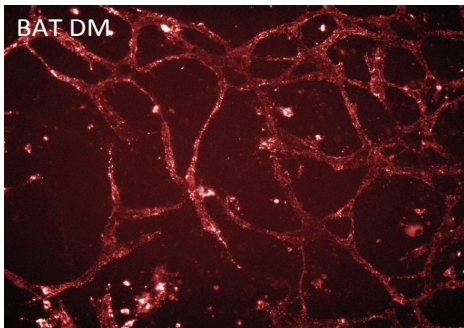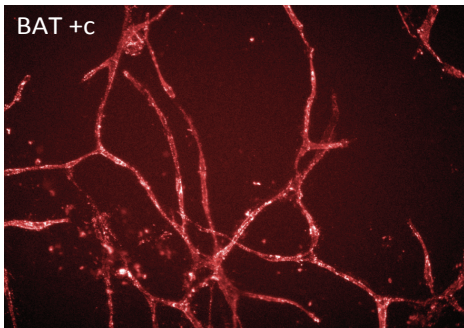

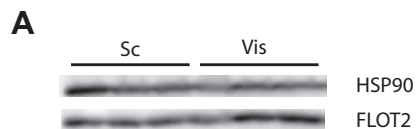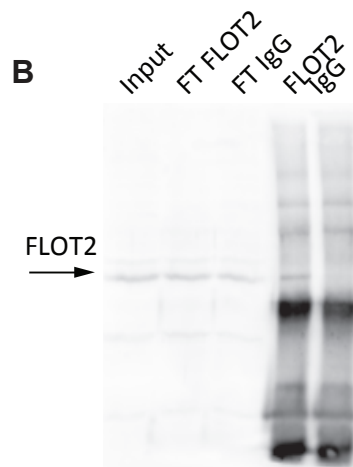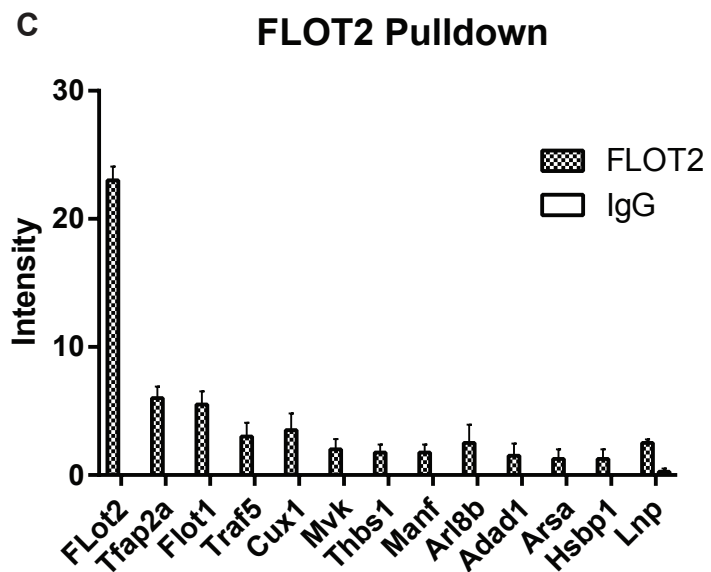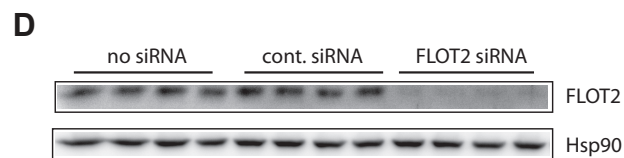

Supplement: mmc1.pdf [file mmc1.pdf]
